# Supplementary material for: Physical activity promotion intervention improved physical activity knowledge, confidence and behaviour among diverse immigrant women: pre–post multiple methods feasibility study
Source: HighWire-hosted journal article supplement (doi:10.1136/bmjopen-2024-086653), 2024-11-01
Supplement: bmjopen-2024-086653supp001_data_supplement.pdf [file bmjopen-2024-086653supp001_data_supplement.pdf]

## Additional File 1. Education session participant satisfaction survey data

## CONTENT

| Questions                                                                    | Responses<br>n (%) |           |         |          |                   |
|------------------------------------------------------------------------------|--------------------|-----------|---------|----------|-------------------|
|                                                                              | Strongly agree     | Agree     | Neutral | Disagree | Strongly disagree |
| I learned about different types of cancer that physical activity can prevent | 24 (55.8)          | 18 (41.9) | ---     | 1 (3.3)  | ---               |
| I learned how much physical activity to do each week                         | 20 (46.5)          | 23 (53.5) | ---     | ---      | ---               |
| I learned about different ways to get physical activity                      | 26 (60.5)          | 17 (39.5) | ---     | ---      | ---               |
| I learned how to overcome barriers of physical activity                      | 21 (48.8)          | 19 (44.2) | 2 (4.7) | 1 (2.3)  | ---               |
| I learned about other ways to reduce cancer risk                             | 16 (37.2)          | 21 (48.5) | 3 (7.0) | 3 (7.0)  | ---               |

## FORMAT

| Questions                                                      | Responses<br>n (%) |           |         |          |                   |
|----------------------------------------------------------------|--------------------|-----------|---------|----------|-------------------|
|                                                                | Strongly agree     | Agree     | Neutral | Disagree | Strongly disagree |
| I had no problem joining the education session                 | 22 (51.2)          | 21 (48.8) | ---     | ---      | ---               |
| I had no problem seeing the trainer and the slides             | 29 (67.4)          | 13 (30.2) | 1 (2.3) | ---      | ---               |
| The slides were easy to understand                             | 25 (58.1)          | 16 (37.2) | 1 (2.3) | 1 (2.3)  | ---               |
| One hour was enough time to review and discuss the information | 14 (32.6)          | 21 (48.8) | 1 (2.3) | 7 (16.3) | ---               |
| I was asked to share ideas or ask questions                    | 20 (51.3)          | 19 (48.7) | ---     | ---      | ---               |

## TRAINER

| Questions                                                        | Responses<br>n (%) |           |         |          |                   |
|------------------------------------------------------------------|--------------------|-----------|---------|----------|-------------------|
|                                                                  | Strongly agree     | Agree     | Neutral | Disagree | Strongly disagree |
| The trainer had good knowledge of physical activity and cancer   | 24 (55.8)          | 19 (44.2) | ---     | ---      | ---               |
| The trainer spoke clearly and slowly enough for me to understand | 23 (53.5)          | 18 (41.9) | 2 (4.7) | ---      | ---               |
| The trainer did a good job of answering participant questions    | 24 (61.5)          | 15 (38.5) | ---     | ---      | ---               |

## USEFULNESS

| Questions                                            | Responses<br>n (%) |           |         |          |                   |
|------------------------------------------------------|--------------------|-----------|---------|----------|-------------------|
|                                                      | Strongly agree     | Agree     | Neutral | Disagree | Strongly disagree |
| The information I learned is useful to me personally | 27 (62.8)          | 15 (34.9) | 1 (2.3) | ---      | ---               |
| I plan to do more physical activity                  | 27 (62.8)          | 16 (37.2) | ---     | ---      | ---               |

## OVERALL

| Questions                                          | Responses<br>n (%) |           |         |              |                   |
|----------------------------------------------------|--------------------|-----------|---------|--------------|-------------------|
|                                                    | Very satisfied     | Satisfied | Neutral | Dissatisfied | Very dissatisfied |
| How satisfied were you with the education session? | 29 (67.4)          | 13 (30.2) | 1 (2.3) | ---          | ---               |
